# 1 Mercury methylating microbial communities of boreal forest soils

2 Jingying Xu<sup>1,\*</sup>, Moritz Buck<sup>1</sup>, Karin Eklöf<sup>2</sup>, Omneya Osman<sup>1</sup>, Jeffra K. Schaefer<sup>3</sup>, Kevin Bishop<sup>2</sup>, Erik  
3 Björn<sup>4</sup>, Ulf Skyllberg<sup>5</sup>, Stefan Bertilsson<sup>1</sup>, Andrea G. Bravo<sup>1,6,\*</sup>

4 <sup>1</sup> *Department of Ecology and Genetics, Limnology, Uppsala University, SE-75236, Uppsala, Sweden*

5 <sup>2</sup> *Department of Aquatic Sciences and Assessment, Swedish University of Agricultural Sciences, SE-  
6 75007, Uppsala, Sweden*

7 <sup>3</sup> *Department of Environmental Sciences, Rutgers University, New Brunswick, New Jersey 08901, USA*

8 <sup>4</sup> *Department of Chemistry, Umeå University, SE-901 87 Umeå, Sweden*

9 <sup>5</sup> *Department of Forest Ecology and Management, Swedish University of Agricultural Science, SE-901  
10 83, Umeå, Sweden*

11 <sup>6</sup> *Department of Environmental Chemistry, Institute of Environmental Assessment and Water Research  
12 (IDAEA), Spanish National Research Council (CSIC), C/Jordi Girona, 18-26 - E-08034 Barcelona –  
13 Spain*

14

15 **Running title: Soil mercury methylating microbial communities**

16 \*corresponding authors: [jingying.xu@ebc.uu.se](mailto:jingying.xu@ebc.uu.se); [jandriugarcia@gmail.com](mailto:jandriugarcia@gmail.com)

17 **Abstract**

18 The formation of the potent neurotoxic methylmercury (MeHg) is a microbially mediated process that  
19 has raised much concern because MeHg poses threats to wildlife and human health. Since boreal forest  
20 soils can be a source of MeHg in aquatic networks, it is crucial to understand the biogeochemical  
21 processes involved in the formation of this pollutant. High-throughput sequencing of 16S rRNA and the  
22 mercury methyltransferase, *hgcA*, combined with geochemical characterisation of soils, were used to  
23 determine the microbial populations contributing to MeHg formation in forest soils across Sweden. The  
24 *hgcA* sequences obtained were distributed among diverse clades, including *Proteobacteria*, *Firmicutes*,  
25 and *Methanomicrobia*, with *Deltaproteobacteria*, particularly *Geobacteraceae*, dominating the libraries  
26 across all soils examined. Our results also suggest that MeHg formation is linked to the composition of  
27 also non-mercury methylating bacterial communities, likely providing growth substrate (e.g. acetate) for  
28 the *hgcA*-carrying microorganisms responsible for the actual methylation process. While previous

29 research focused on mercury methylating microbial communities of wetlands, this study provides some  
30 first insights into the diversity of mercury methylating microorganisms in boreal forest soils.

31

## 32 **Importance**

33 Despite a global state of awareness that mercury, and methylmercury in particular, is a neurotoxin that  
34 millions of people continue to be exposed to, there are sizable gaps in our fundamental understanding of  
35 the processes and organisms involved in methylmercury formation. In the present study we shed light on  
36 the diversity of the microorganisms responsible for methylmercury formation in boreal forest soils. All  
37 the microorganisms identified have a relevant role on the processing of organic matter in soils.  
38 Moreover, our results show that the formation of methylation formation is not only linked to mercury  
39 methylating microorganisms but also to the presence of non-mercury methylating bacterial communities  
40 that contribute to methylmercury formation by the appropriate substrate to the microorganisms  
41 responsible for the actual methylation process. This study improves current knowledge on the diversity  
42 of organisms involved in methylmercury formation in soils.

43

## 44 **INTRODUCTION**

45 Mercury (Hg) is a potent toxin that might cause severe negative effects on wildlife and human health (1).  
46 The toxicity of Hg is of such concern that 128 countries have signed the Minamata Convention, a global  
47 treaty that entered into force in August 2017 with the explicit objective to reduce Hg emissions and  
48 protect human health and the environment. High Hg emissions in the past have led to high present-day  
49 Hg levels in different parts of the atmosphere, oceans and terrestrial ecosystems (2, 3). Because Hg has  
50 a strong affinity for reduced sulphur or thiol (RSH) functional groups of soil organic matter (OM) (4, 5),  
51 the increased atmospheric deposition of Hg during the industrialisation has resulted in high Hg  
52 concentrations in organic-rich soils (6). As a consequence, the typically OM-rich soils in the boreal  
53 biome has retained Hg deposition from both natural and anthropogenic emissions, and now represent an  
54 important global Hg stock (4, 7).

55 Soil OM has also been identified as a main vector of Hg and methylmercury (MeHg) transport from  
56 catchments to surface waters in boreal areas (8, 9). Indeed, the mobilisation of inorganic Hg ( $\text{Hg}^{\text{II}}$ ) and,  
57 the more harmful, MeHg from soils by means of OM-mediated transport has been linked to MeHg  
58 accumulation in lake sediments within catchments (9, 10) and in fish (11). As high MeHg levels in fish  
59 have raised much concern in many boreal regions over the past decades (12, 13) and since forest soils  
60 are an important site for MeHg formation (14), it is crucial to understand the processes and the  
61 organisms involved in MeHg formation in boreal soils.

62 The methylation of  $\text{Hg}^{\text{II}}$  to MeHg is biologically mediated (15) and takes place under oxygen deficient  
63 conditions typical for wetlands (16), water logged soils (14), sediments (9) and anoxic water columns  
64 (17), but can also occur in suspended particles in the aerobic zone of aquatic systems (18, 19). Specific  
65 strains of sulphate-reducing bacteria (20, 21), iron reducing bacteria (FeRB) (22, 23), methanogens (24)  
66 and Firmicutes (25) have the capability to methylate  $\text{Hg}^{\text{II}}$ . However, a number of factors controlling  
67 bacterial activity and/or the geochemical speciation of inorganic  $\text{Hg}^{\text{II}}$  will govern MeHg formation in  
68 the environment (9, 26). For example, increases in temperature might lead to increases in biological  
69 activity and accordingly also higher  $\text{Hg}^{\text{II}}$  methylation rates (27). Redox potential also seems to be a key  
70 factor as suboxic and mildly reducing conditions seem to promote high  $\text{Hg}^{\text{II}}$  methylation rates,  
71 whereas anoxic and strongly reducing conditions might lead to elevated sulphide concentrations that  
72 eventually prevent  $\text{Hg}^{\text{II}}$  from being available for methylation (28). Sulphur plays a major role in  
73 influencing  $\text{Hg}^{\text{II}}$  methylation by directly affecting the activity of some methylating bacteria (e.g.  
74 sulphate reducing bacteria, SRB) and/or control the availability of  $\text{Hg}^{\text{II}}$  for methylation (5). Specific  
75 organic matter (OM) compounds can promote  $\text{Hg}^{\text{II}}$  methylation by enhancing bacterial activity (9), but  
76 also by defining  $\text{Hg}^{\text{II}}$  speciation (29) and  $\text{Hg}^{\text{II}}$  availability (30, 31). OM can also facilitate  $\text{Hg}^{\text{II}}$   
77 methylation by inhibiting mercury sulphide ( $\text{HgS(s)}$ ) precipitation or enhance  $\text{HgS(s)}$  dissolution  
78 thereby providing available  $\text{Hg}^{\text{II}}$  for methylating microorganisms (32). High OM concentrations might  
79 also decrease Hg methylation by formation of high mass molecular mass complexes that hamper  $\text{Hg}^{\text{II}}$   
80 availability (30). Recently it has been concluded that the availability of  $\text{Hg}^{\text{II}}$  depends heavily on the  $\text{S}^{\text{(II)}}$   
81 concentration in porewater and the  $\text{RSH(aq)}/\text{RSH(ads)}$  molar ratio of DOM (29). Together, all these

82 studies highlight that geochemical conditions are key in determining the availability of Hg<sup>(II)</sup> and the  
83 activity of the microbial communities involved in the process.

84 The identification of two functional genes, *hgcA* and *hgcB*, which play essential roles in Hg<sup>(II)</sup>  
85 methylation (15), provided the means to more directly characterise the complexity of microbial  
86 communities involved in the formation of MeHg in natural ecosystems. This approach has been applied  
87 to marshes, sediments and swamps in several geographic regions (33–36); rice paddies in China (37),  
88 and water conservation areas of the northern Everglades, USA (38). However, very little work to date  
89 has been conducted to reveal the distribution of microbial groups responsible for Hg<sup>(II)</sup> methylation in  
90 forest soils within the vast boreal biome. To the best of our knowledge, no studies have directly  
91 described the composition and spatial variation in Hg<sup>(II)</sup> methylating microbial communities in such  
92 forests. Therefore, the primary goal of this paper was to describe Hg<sup>(II)</sup> methylating microbial  
93 communities in various boreal forest soils and identify soil characteristics important for shaping these  
94 communities. High-throughput next generation sequencing of amplified 16S rRNA and *hgcA* genes  
95 combined with molecular barcoding and detailed soil geochemical characterisations were performed to  
96 study the Hg<sup>(II)</sup> methylating microbial communities in 200 soil samples from three different boreal forest  
97 regions in order to shed light on the biogeography of microorganisms responsible for MeHg formation  
98 in the boreal landscape.

## 99 **RESULTS**

### 100 **Bacterial community composition in boreal forest soils**

101 Soil samples were collected from 200 sites in October 2012 and were distributed across eight  
102 catchments in three boreal forest regions in Sweden (Table S1, Table S2). A total of 3 321 197 high  
103 quality 16S rRNA sequences remained after quality control and chimera removal (7–72 911 reads per  
104 sample). The sample with only 7 reads was removed, and we then rarefied the rest of the data to the  
105 remaining sample with the fewest reads (1692 reads). The final rarefied sequence dataset (329 940 reads)  
106 clustered into 33 158 operational taxonomic units (OTUs) using a similarity threshold of 97 %. In the  
107 rarefied dataset, 35 taxa at phyla level, 69 taxa at class level, 119 taxa at order level, and 187 taxa at

108 family level were detected from all the soil samples across three regions. The overall coverage of the  
109 forest bacterial community is reflected in the combined richness detected for random subsets of  
110 analysed samples. The logarithmic shape indicated that most of the considerable OTU richness  
111 occurring in the forest soils was accounted for in the combined dataset (Fig. S1). Among the dominant  
112 phyla across all regions (>5 % relative abundance), *Acidobacteria* was the most abundant, followed by  
113 *Proteobacteria*, *Planctomycetes*, *Bacteroidetes*, *Parcubacteria* and *Verrucomicrobia* (Table 1).  
114 Combined, these phyla accounted for 77.5 % of the total sequences (Table 1). Most of the previously  
115 identified clades known to contain Hg<sup>(II)</sup> methylators (25, 39) were detected in the present study,  
116 including *Deltaproteobacteria* (3.31 % of the total reads), *Chloroflexi* (2.60 % of the total reads),  
117 *Firmicutes* (0.77 % of the total reads) and *Euryarchaeota* (0.66 % of the total reads) (Table 1).  
118 Microbial community composition based on 16S rRNA sequences in the 34 studied MeHg hotspots  
119 showed a similar pattern in terms of the dominant phyla (>5 % relative abundance), with *Acidobacteria*  
120 and *Proteobacteria* being the most abundant ones. However, *Bacteroidetes* and *Chloroflexi* contributed  
121 much more to the total communities at these hotspots compared to the combined dataset across all 200  
122 samples (Table 1).

123 A non-metric multidimensional scaling (nMDS) plot based on 16S sequences was used to visualise the  
124 composition of the bacterial community among samples. *Unclassified Acidobacteriales*, *Unclassified*  
125 *Ignavibacteriales*, *Spirochaetaceae*, *Holophagaceae*, *Anaerolineaceae*, *Betaproteobacteria* and  
126 *Tepisphaeraceae* were important contributing families for shaping the differences in bacterial  
127 community composition among samples (Fig. 1). Geochemical factors that were correlated (correlation  
128 coefficients > 0.5) with the bacterial composition were projected on top with longer vectors implying  
129 stronger correlations (Fig. 1). %MeHg, reflected by bubble sizes, presented a strong coupling to the  
130 bacterial community composition, which was further confirmed by %MeHg presenting a long vector  
131 among all the geochemical factors (Fig. 1). Water content, C%, S% and N% were all found to be the  
132 factors that affected the composition of soil bacterial community (Fig. 1), indicating that a supply of  
133 organic matter and nutrients in the moist soil shapes the bacterial community. This is in agreement with  
134 previous research that pointed out the contribution of nutrients and organic matter to bacterial activities

135 and Hg<sup>(II)</sup> methylation (9, 28). Also, S was well correlated with both C and N (Table S3), suggesting that  
136 most of the measured sulphur in the sampled soils has likely an organic origin. This has been found as a  
137 common feature in boreal soils (40–42).

138 *Unclassified Fibrobacterales*, *Methanosaetaceae*, *Unclassified Ignavibacteriales*, *Spirochaetaceae*,  
139 *Holophagaceae* and *Anaerolineaceae* exhibited the highest correlations with %MeHg (Table 2).  
140 *Syntrophobacteraceae*, *Methanosarcinaceae*, *Methanoregulaceae*, *Desulfobulbaceae*, *Syntrophaceae*,  
141 *Desulfobacteraceae* and *Dehalococcoidaceae*, which potentially host Hg<sup>(II)</sup> methylators (25, 39), were  
142 also found relevant to the bacterial community composition in high-%MeHg sites (Table 2).

143 **Figure 1.**

#### 144 **Distribution of Hg<sup>(II)</sup> methylators**

145 The samples with high soil MeHg concentrations and %MeHg > 1% were defined as “MeHg hotspots”.  
146 In 34 MeHg hotspots (see soils geochemistry descriptors in Table S4, n = 34), the relative abundance of  
147 microbial families carrying representatives known to methylate Hg<sup>(II)</sup> was assessed based on *hgcA*  
148 sequences (25, 39). A total of 1 257 577 *hgcA* sequences remained after quality control and chimera  
149 removal (11 404–55 461 reads per sample). The *hgcA* dataset was rarefied to the remaining sample with  
150 the fewest reads (11 404 reads). The rarefied sequence dataset accounted a total of 387 736 reads that  
151 clustered into 573 operational taxonomic units (OTUs) using a similarity threshold of 97 %. As for the  
152 16 rRNA, the logarithmic shape indicated that most of the considerable species richness of Hg<sup>(II)</sup>  
153 methylators occurring in the forest soils was accounted for in the combined dataset (Fig. S1).  
154 Representative sequences from 22 families were found in the 34 analysed MeHg hotspots. Of all the  
155 *hgcA* sequences, 3.13 % were not taxonomically assigned (Unclassified), 0.28 % were unclassified  
156 *Euryarchaeota*, and 7.28 % could not be assigned beyond the rank of Bacteria (Unclassified Bacteria).  
157 The majority of the sequences annotated to the level of family clustered with *Deltaproteobacteria*,  
158 making up 85.4 % of all the *hgcA* reads (Table 3). The remaining classified *hgcA* sequences were  
159 distributed across diverse families affiliated to *Firmicutes* and *Methanomicrobia*. *Unclassified*  
160 *Deltaproteobacteria* represented up to 56 % of the reads and among the identified families,

161 *Geobacteraceae* were the most abundant, contributing up to 40 % in Strömsjöleden. *Ruminococcaceae*  
162 (3.21 % of all *hgcA* reads) occurred as another important family in the hotspots in Örebro; while  
163 methanogens and syntrophic lineages were less abundant in the hotspots based on *hgcA* sequences  
164 (Table 3).

165 *Unclassified Desulfuromonadales*, *Geobacteraceae*, *Ruminococcaceae*, *unclassified Desulfovibrionales*,  
166 *Desulfovibrionaceae*, and *unclassified Deltaproteobacteria* seemed to contribute to differences in the  
167 composition of Hg<sup>(II)</sup> methylators in the studied soils (Fig. 2a). Among the measured geochemical  
168 parameters, the S% and the C/S seemed to have an impact on shaping the community composition of  
169 Hg<sup>(II)</sup> methylators (Fig. 2b). Moreover, *Methanoregulaceae*, *Desulfovibrionaceae*,  
170 *Desulfuromonadaceae*, *Desulfarculaceae* and *Methanomassiliicoccaceae* correlated positively with S%  
171 and negatively with C/S (Table S5). In the studied MeHg hotspots, S was strongly correlated with both  
172 C and N (Table S6), suggesting most of the measured sulphur in the hotspots is also likely presented in  
173 organic forms.

174

#### 175 **Phylogenetic analysis of *hgcA* genes**

176 All the *Proteobacteria* families belonged to *Deltaproteobacteria*, a class with which most currently  
177 confirmed Hg<sup>(II)</sup>-methylating bacteria are affiliated (43, 44). When combined, the 20 most abundant  
178 OTUs accounted for 72 % of the total reads. Noteworthy, phylogenetic analysis revealed that the most  
179 abundant Hg<sup>(II)</sup>-methylating OTUs ("OTU\_0005", "OTU\_0705", "OTU\_0008", and "OTU\_0012") in  
180 the studied forest soils were either taxonomically assigned as *Geobacter sp.* or phylogenetically related  
181 to *Geobacter* species (Fig. 3). Among the 20 most abundant OTUs, 17 were taxonomically annotated as  
182 *Deltaproteobacteria*. Among these 17 OTUs, 9 were taxonomically annotated as *Geobacter* and 8 were  
183 phylogenetically related to *Geobacter* species (Fig. 3). Summing the identified *Geobacter* and the OTUs  
184 phylogenetically related to *Geobacter* species, these 17 OTUs accounted for 62 % of the total *hgcA*  
185 reads. The 5<sup>th</sup> most abundant OTU and was taxonomically denoted as *Firmicutes (Ethanoligenens)* and  
186 the 6<sup>th</sup> and 7<sup>th</sup> could not be annotated beyond the bacterial domain.

187

## 188 DISCUSSION

### 189 Community composition of Hg<sup>(II)</sup> methylators in boreal forest soils

190 Among the diverse microbial communities seen in the soil samples (Table 1), most of the previously  
191 identified Hg<sup>(II)</sup> methylating groups, e.g., *Deltaproteobacteria*, *Chloroflexi*, *Firmicutes* and  
192 *Euryarchaeota* could be detected (Table 3). *Deltaproteobacteria* have been considered a predominant  
193 Hg<sup>(II)</sup> methylating class in anaerobic soils (34, 37, 38). In the present study, *Deltaproteobacteria* were  
194 also the predominant Hg<sup>(II)</sup> methylators at the hotspots with *Geobacteraceae* as the most represented  
195 family. This family alone contributed over 30% of all *hgcA* reads, and their importance could be seen at  
196 all the sampled sites and particularly in Strömsjöleden (Table 3). Iron reducing bacteria (FeRB) have  
197 previously been shown to be important for Hg<sup>(II)</sup> methylation in some environments (22, 23, 36, 43), and  
198 most *Geobacter* tested so far are particularly efficient at MeHg formation in the laboratory (23). This  
199 suggests that the ability to methylate Hg<sup>(II)</sup> is widely distributed and a typical feature among the  
200 *Geobacteraceae*. The lack of a specific inhibitor for FeRB have hindered the quantification of the  
201 relative contribution of FeRB compared to SRB (i.e. molybdate inhibitor) and methanogens (i.e.  
202 Bromoethanesulfonate inhibitor) to MeHg formation. The discovery of the *hgcA* pushed the state of the  
203 art and made possible to identify Hg<sup>(II)</sup> methylators in environment (15, 25). Our results combined with  
204 previous findings in wetlands and paddy soils (34, 37, 38) highlight the importance of *Geobacteraceae*  
205 as Hg<sup>(II)</sup> methylators in boreal forest soils and evidence their potentially very important roles in a wide  
206 range of environments.

207 While SRB are considered to be the principal Hg<sup>(II)</sup> methylators in aquatic systems (27, 45–48), not  
208 much information is available on Hg<sup>(II)</sup> methylators in soils. However, identified SRB in the hotspots  
209 only accounted for a minor portion of Hg<sup>(II)</sup> methylators (Table 3). However, it is nevertheless plausible  
210 that at least some of the *hgcA* sequences annotated as unclassified *Deltaproteobacteria* (Table 3) could  
211 be unknown Hg<sup>(II)</sup> methylating SRB or even Hg<sup>(II)</sup> methylating sulphate-reducing syntrophs, capable of  
212 syntrophic fermentation of simple organic acids in the absence of sulphate as the terminal electron  
213 acceptor (49, 50). Therefore, we cannot discard the possibility that also SRB contribute significantly to  
214 Hg<sup>(II)</sup> methylation in the studied systems. A previous study based on selective inhibitors and rate



215 measurements indeed suggested SRB played an important role in MeHg formation in boreal forest soils  
216 (41). Additionally it has been demonstrated that even when SRB belong to the ‘rare biosphere’ of  
217 peatlands, they contribute significantly to respiration processes (51).

218 *Ruminococcaceae* belongs to another newly confirmed representative of Hg<sup>(II)</sup> methylators, the  
219 *Firmicutes* (25). *Firmicutes* contributed to Hg<sup>(II)</sup> methylating microbial communities at the water  
220 conservation areas of the Florida Everglades (38) but were not detected in boreal wetlands (34). In the  
221 present study, *Ruminococcaceae* were prominent contributors to the *hgcA* pool in hotspots from Örebro  
222 and in all soils from Strömsjöleden (Table 3). They could thus play a role in shaping the composition of  
223 Hg<sup>(II)</sup> methylating community as further indicated by the negative correlation though weak between  
224 *Ruminococcaceae* and C/S, a primary geochemical factor shaping Hg<sup>(II)</sup> methylating communities in the  
225 hotspots (Table S5 and Fig. 2b). Not much research has been devoted to the possible relationship  
226 between organic S and Hg<sup>(II)</sup> methylating *Ruminococcaceae*. Considering the abundance of this group in  
227 forest soils, further efforts are needed to shed light on the metabolic or physiological pathways of Hg<sup>(II)</sup>  
228 methylating *Ruminococcaceae*.

229 Methanogens were early on suspected to be responsible for Hg<sup>(II)</sup> methylation (52), but not until recently  
230 were they verified as a significant source of Hg<sup>(II)</sup> methylators in various environments (24, 34). In the  
231 hotspots in the studied soils, they were also detected, though not very abundant in the Hg<sup>(II)</sup> methylating  
232 microbial community. *Chloroflexi* has recently been identified as potential Hg<sup>(II)</sup> methylators in the  
233 water conservation areas, paddy soils and wetlands (34, 38, 53). The *hgcA* data did not confirm any  
234 significant role of this group in MeHg production in boreal forest soils (Table 3), even though 16S  
235 rRNA data revealed non-Hg<sup>(II)</sup> methylating *Chloroflexi* (e.g. the class *Anaerolineae*) in soils from all  
236 three regions (Table 1).

237 Previous studies have mainly explored flooded environments such as paddy soils (37), boreal wetlands  
238 (34) and the water areas of the Florida Everglades (38). Hence our study provided important new  
239 information on the composition and diversity of Hg<sup>(II)</sup> methylating microbial communities in non  
240 flooded boreal forest soils and the boreal landscape, and in doing so identified *Geobacteraceae* as  
241 significant Hg<sup>(II)</sup> methylators in the terrestrial biome. The diversity of Hg<sup>(II)</sup> methylators described in

242 this study need to be interpreted cautiously. The *hgcA* gene was only recently discovered and the  
243 optimization of the appropriate methods and, in particular the design of primers for the *hgcA*  
244 amplification, is still developing (54). Additionally, DNA based methods only reveal the presence of  
245 organisms, while alternative approaches based on transcription data, proteomes or rate measurements  
246 are needed for verifying their activity. Our data nevertheless provide new insights about Hg<sup>(II)</sup>  
247 methylating microbial communities in boreal forest soils and can as such guide and serve as a resource  
248 for future research efforts in this field.

#### 249 **Bacterial communities fuel Hg<sup>(II)</sup> methylators**

250 %MeHg has previously been used as a proxy for methylation efficiency (55, 56), and high %MeHg has  
251 also in a few cases been shown to correlate positively with the abundance of Hg<sup>(II)</sup> methylators (14, 57).  
252 In the current study, sites with high %MeHg featured bacterial communities different from those  
253 observed at sites with low % MeHg (Fig. 1). Although, families known to contain Hg<sup>(II)</sup> methylators  
254 (*Syntrophobacteraceae*, *Methanosarcinaceae*, *Methanoregulaceae*, *Desulfobulbaceae*, *Syntrophaceae*,  
255 *Desulfobacteraceae* and *Dehalococcoidaceae*; 25) were found at sites with high %MeHg, there were  
256 also positive correlations between %MeHg and families that are not known to host Hg<sup>(II)</sup> methylators,  
257 such as *Unclassified Fibrobacterales*, *Methanotherix* (formerly *Methanosaeta*), *Unclassified*  
258 *Ignavibacteriales*, *Spirochaetaceae*, *Holophagaceae* and *Anaerolineaceae* (Table 2). This suggests that  
259 not only the Hg<sup>(II)</sup> methylators themselves, but also the supporting and interacting bacterial communities  
260 residing in the soil environment may influence MeHg formation across the studied regions.  
261 *Anaerolineaceae*, *Spirochaetaceae* and *Holophagaceae* are for example known to generate acetate by  
262 fermentation processes (58). *Fibrobacterales*, have recently been suggested to have an important role in  
263 cellulose hydrolysis in anaerobic environments, including soils (59). The *Ignavibacteria* class was  
264 recently described (Iino et al., 2010) and the physiology and metabolic capacities of this group is still  
265 poorly known, even if a distinctive feature of this group is the ability to grow on cellulose and its  
266 derivatives with the utilization of Fe(III) oxide as electron acceptor (60). It may well be that these  
267 families, which correlated well with %MeHg (Table 2) and seem to be involved in the degradation of  
268 long chain OM compounds (61, 62), promoted MeHg production by providing appropriate substrates

269 (e.g. acetate) for the Hg<sup>(II)</sup> methylators. Hg<sup>(II)</sup> methylators and non-Hg<sup>(II)</sup> methylating members of  
270 *Desulfobulbaceae*, known to oxidise organic substrates incompletely to acetate (63), might also have  
271 provided the necessary substrate to Hg<sup>(II)</sup> methylators (Table 2). Based on our results, we propose an  
272 important role of also the non-Hg<sup>(II)</sup> methylating bacterial heterotrophs in sustaining the activity of the  
273 Hg<sup>(II)</sup> methylating microorganisms and thereby influencing MeHg formation in boreal forest soils.  
274 Moreover, the correlation between *Methanothrix* and %MeHg deserves special attention. It has been  
275 shown that *Methanothrix* can establish syntrophic cooperation with *Anaerolineaceae* (61) or  
276 *Geobacteraceae* (64) in methanogenic degradation of long chain carbon compounds (alkanes). As our  
277 results show that *Geobacteraceae* are major contributors to the Hg<sup>(II)</sup> methylating microbial community  
278 (Table 3), the high correlation found between *Methanothrix* and %MeHg could be the result of the  
279 interaction between the non-Hg<sup>(II)</sup> methylating *Methanothrix* and the Hg<sup>(II)</sup> methylating *Geobacteraceae*.  
280 In brief, we provide novel system-level information on putative trophic interactions between non-Hg<sup>(II)</sup>  
281 methylating and the Hg<sup>(II)</sup> methylating taxa. We further suggest that more in depth studies with  
282 metagenome-level sequencing and metabolic pathway reconstruction will be a logical next step to gain a  
283 more complete understanding of how Hg<sup>(II)</sup> methylating bacterial and archaeal species interact in soils.

## 284 CONCLUSIONS

285 A newly developed strategy that combine high-throughput *hgcA* amplicon sequencing with molecular  
286 barcoding revealed diverse clades of Hg<sup>(II)</sup> methylators in forest soils. This study confirms a  
287 predominant role of *Deltaproteobacteria*, and in particular *Geobacteraceae*, as key Hg<sup>(II)</sup> methylators in  
288 boreal forest soils. *Firmicutes*, and in particular *Ruminococcaceae*, were also abundant members of the  
289 Hg<sup>(II)</sup> methylating microbial community. Besides the identified Hg<sup>(II)</sup> methylators, we suggest that the  
290 non-Hg<sup>(II)</sup>-methylating bacterial community (e.g. *Anaerolineaceae*, *Holophagaceae* and  
291 *Spirochaetaceae*) might have contributed to the net MeHg formation (%MeHg) by processing OM and  
292 thereby providing low OM compounds as a substrate to Hg<sup>(II)</sup> methylators (e.g acetate). By revealing  
293 linkages between Hg<sup>(II)</sup> methylators and non- Hg<sup>(II)</sup> methylators, our results calls for further community-  
294 level work on the metabolic interactions in soil microbial communities to understand Hg<sup>(II)</sup> methylation.

295 Such studies would need to go beyond the Hg<sup>(II)</sup> methylating microbial populations. Our findings  
296 provide a better understanding of Hg<sup>(II)</sup> methylating microbial communities in forest soils and the boreal  
297 landscape.

## 298 **MATERIALS AND METHODS**

### 299 **Site description**

300 Soil samples were collected from 200 sites in October 2012 and were distributed across eight  
301 catchments in three boreal forest regions in Sweden (Table S1 and S2). Within each of the catchments,  
302 25 samples were collected. The most southern region Örebro (59°10'16.39"N 14°34'3.01"E) includes  
303 three catchments and the sampled soils are dominantly Podzol with Histosols (65) in the lower parts of  
304 the catchments along the streams. The organic matter (O) horizons were most often thicker than 20 cm.  
305 More detailed information is given in Eklöf et al. (66). Two northern regions, Balsjö (64°1'37"N  
306 18°55'43"E) and Strömsjöleden (64°6'48"N 19°7'36"E), are located 600–700 km north of Örebro and  
307 around 14 km apart from each other. Balsjö includes three catchments dominated by orthic Podzol, with  
308 Histosols along the streams. The O horizons were most often thicker than 10–20 cm in the lower parts  
309 and less than 10 cm higher up in the catchments. More details are given in Löfgren *et al.* (2009).  
310 Strömsjöleden includes two catchments and the soils are dominated by fine-grained moraine. The  
311 organic layers are most often less than a few centimetres deep. The samples with high soil MeHg  
312 concentrations and %MeHg > 1% were defined as “MeHg hotspots” (n=34), see a summary of the soil  
313 characteristics of “MeHg hotspots” in Table S4.

314 The daily mean air temperatures during the 9 sampling days in September in 2012 varied between 7 and  
315 12 °C in Örebro catchments and 4 and 11 °C in Balsjö and Strömsjöleden catchments. There were no  
316 major rain events during the sampling period and the temperature and precipitation was normal for the  
317 time of the year.

### 318 **Soil sampling**

319 Soil samples were collected with a soil coring tube (Ø=23 mm). In each catchment, around half of the  
320 samples (n=12) were collected systematically along the topographic fall line of the hill slope, at set

321 distances from the stream draining the area. These samples were collected from the upper 6 cm of the O  
322 horizons or the whole O horizons if these were less than 6 cm deep. The locations of the remaining  
323 sampling sites (n=13) were chosen by actively looking for potential hot spots for MeHg formation, such  
324 as wet patches, driving tracks and stump holes. These targeted samples were also collected from various  
325 depths, e.g. depths where groundwater levels were most frequently fluctuating were of special interest  
326 for potential Hg<sup>(II)</sup> methylation.

327 Single-use plastic gloves were used and soil samples for chemical analyses were collected in plastic  
328 bags or acid washed Falcon tubes and stored on ice in a cooler during transport to the laboratory (within  
329 8 hours). Soil samples for molecular analyses were collected following adequate aseptic sampling  
330 protocols. All sampling equipment was sterilized by washing in 70% ethanol in between samples.  
331 Samples were collected in sterilized plastic tubes and frozen in liquid nitrogen directly in the field, and  
332 then stored at -80°C until further processing and analyses.

### 333 **Chemical analyses**

334 Soil samples were analysed for total Hg (THg), MeHg, water content, and mass percentage of carbon  
335 (C), nitrogen (N) and sulphur (S). Samples were freeze-dried and ground by hand in a mortar prior to  
336 analyses for THg, C%, N% and S%. Wet and dry weights were measured to estimate the water content.

337 Total Hg was measured using a Perkin Elmer SMS100 total Hg analyser in accordance with US EPA  
338 method 7473. The method includes a thermal decomposition step, followed by amalgamation and  
339 atomic absorption spectrophotometric detection (working range 0.05–600 ng). Reproducibility and  
340 accuracy of measurements were checked by analyses of replicate samples and reference standards.

341 Analyses of MeHg were done by using GC-ICPMS (68) on fresh samples immediately after thawing. C,  
342 N and S were analysed on dry soils packed tightly in tin capsules (Elemental Microanalysis, 6.4 mm)  
343 and subsequently measured by high temperature catalytic oxidation with a COTECH ECS 4010  
344 elemental analyser calibrated with sulfanilamide standard (C 41.84 %, N 16.27 %, H 4.68 %, O 18.58  
345 %, S 18.62 %). Analytical precision was < ± 0.3 % for C, ± 1.5 % for N and ± 3.5 % for S.

### 346 **Microbiological analyses**

347 **16S rRNA gene:** Microbial DNA was extracted from soil samples using the Power soil DNA  
348 isolation Kit (MoBio Laboratories Inc, CA, USA) and the quality of the extracted DNA was assessed by  
349 gel electrophoresis (1% agarose). Bacterial 16S rRNA genes were amplified in two steps polymerase  
350 chain reaction (PCR) according to the protocol in Sinclair *et al* (2015). Briefly, non-barcoded primers  
351 Bakt\_341F and Bakt\_805R (Table S7) were used for the 1<sup>st</sup> PCR step of 20 cycles. The resulting PCR  
352 products were diluted 100 times before being used as template in a 2<sup>nd</sup> PCR step of 10 cycles with  
353 similar primers carrying sample-specific 7-base DNA barcodes. All PCRs were conducted in 20  $\mu$ L  
354 volume using 1.0 U Q5 high fidelity DNA polymerase (NEB, UK), 0.25  $\mu$ M primers, 0.2 mM dNTP  
355 mix, and 0.4  $\mu$ g bovine serum albumin. The thermal program consisted of an initial 95 °C denaturation  
356 step for 5 min, a cycling program of 95 °C for 40 seconds, 53 °C for 40 seconds, 72 °C for 60 seconds  
357 and a final elongation step at 72 °C for 7 minutes. Amplicons from the 2<sup>nd</sup> PCR were purified using the  
358 Qiagen gel purification kit (Qiagen, Germany) and quantified using a fluorescence-based DNA  
359 quantitation kit (PicoGreen, Invitrogen). The final amplicons after two PCR steps were pooled in equal  
360 proportions to obtain a similar number of sequencing reads per sample. Amplicon sequencing was  
361 carried out following the protocol described in Sinclair *et al* (2015) using the MiSeq instrument.  
362 Illumina sequencing was performed by the SNP/SEQ SciLifeLab facility hosted by Uppsala University  
363 using 300bp chemistry. Chimera identification and OTU (Operational Taxonomic Unit) clustering by  
364 denoising was done using UNOISE (from USEARCH version 9, ref. 70, 71). SINTAX (from  
365 USEARCH version 9, ref. (72)) with the SILVA reference database (release 128) was used as a base to  
366 taxonomically annotate OTUs. The sequence data has been deposited to the EBI Archive under  
367 accession number PRJEB20882.

368 **HgcA gene:** Among the 50 samples selected based on having %MeHg >1 %, 34 resulted in positive  
369 PCR amplification of the *hgcA* gene. The protein-coding gene *hgcA* which plays an essential role in Hg  
370 methylation was amplified with previously published *hgcA* primers (*hgcA\_261F* and *hgcA\_912R*)  
371 (Table S7, 34) modified for parallelized high-throughput Illumina sequencing. HPLC-purified primers  
372 carrying Illumina adaptors at the 5' end (*hgcA\_261F\_Adaptor* and *hgcA\_912R\_Adaptor*, Table S7) were  
373 here used for the 1<sup>st</sup> stage PCR. In the 2<sup>nd</sup> stage PCR, standard Illumina handles and barcode primers

374 (Table S7) were used to enable pooling of all the samples for parallelized Illumina sequencing. *HgcA*  
375 was first amplified in 50  $\mu$ L volume with 1x Phusion GC Buffer, 0.2 mM dNTP mix, 5% DMSO, 0.1  
376  $\mu$ M of each adaptor-linked primer, 7  $\mu$ g/ $\mu$ L BSA, 4  $\mu$ L extracted DNA template, and 1.0 U Phusion high  
377 fidelity DNA polymerase (NEB, UK) for an initial denaturation of 2 min at 98 °C followed by 35 cycles  
378 (10 s at 96 °C, 30 s 56.5 °C and 45 s at 72 °C), and a final extension at 72°C for 7 min. Following this  
379 initial step, a 2<sup>nd</sup> PCR was conducted to add sample-specific molecular barcodes. Reactions were carried  
380 out in 20  $\mu$ L volumes using 1x Q5 reaction buffer, 0.2 mM dNTP mix, 0.1  $\mu$ M barcode primers, purified  
381 1<sup>st</sup> PCR products and 1.0 U Q5 high fidelity DNA polymerase (NEB, UK) for an initial denaturation of  
382 30 s at 98 °C followed by 18 cycles (10 s at 98 °C, 30 s 66 °C and 30 s at 72 °C), and a final extension  
383 at 72°C for 2 min. The quality and size of the *hgcA* amplicons were assessed by gel electrophoresis and  
384 GelRed visualization on a 1% agarose gel (Invitrogen, USA) prior to purification by Agencourt AMPure  
385 XP (Beckman Coulter, USA) after both PCR steps. Quantifications of purified amplicons from the 2<sup>nd</sup>  
386 stag PCR were performed using the PicoGreen kit (Invitrogen).

387 Amplicons were sequenced using the same method as for the 16S rRNA gene. Forward read  
388 sequences were only used in data analysis due to long PCR product. Low quality sequences were  
389 filtered and trimmed using SICKLE (73) and adapter were removed by using CUTADAPT (74).  
390 Subsequent processing of reads were performed by USEARCH and clustered at 60% identity cutoff  
391 using cd-hit-est (75). HMMER (76) search was used for taxonomical annotation with manually curated  
392 database of *Proteobacteria* and sequences of Podar *et al.* (2015). More details can be found in Bravo *et*  
393 *al.* (2018).

394 **Phylogenetic analysis:** A phylogenetic analysis was performed for *hgcA* sequences representative  
395 for the OTUs observed for the 34 hotspots and existing *hgcA* entries in our curated database. The  
396 sequences were adequately curated and taxonomy homogenized using taxtastic  
397 [<https://github.com/fhrc/taxtastic>] and the R-package taxize (77). The obtained protein sequences were  
398 aligned with MUSCLE (78) (version 3.8.1551). The alignment was trimmed to the size of the amplicon,  
399 and a tree was generated using RAxML (79) (version 8.2.4) - with the PROTGAMMLG model and

400 autoMR to choose the number of necessary bootstrap resamplings ( $n = 750$ ). This tree and the  
401 corresponding alignment were used to generate a reference package for PPLACER (80). The guppy tool  
402 of PPLACER was then used to classify the sequences with a likelihood threshold of 0.8.

### 403 **Statistical analysis**

404 Family-level microbial community composition in the different samples were compared using non-  
405 metric multidimensional scaling (nMDS) based on Bray-Curtis similarities and using the software  
406 PRIMER 7 (81). Information on the common set of samples from community composition based on  
407 Bray-Curtis similarities and that from geochemical variables based on Euclidean distance was presented  
408 in one single ordination. A combined nMDS plot with bubble and vector plots of geochemical factors  
409 projected on the same ordination of community composition was constructed to reveal the relationships  
410 between community compositions and potentially explanatory geochemical variables (81). Pearson's  
411 correlation coefficient (R) was assessed to reveal linear relationships between variables using a  
412 significance level of  $\alpha < 0.05$ .

### 413 **Acknowledgements**

414 This project was carried out within the Swedish-Sino SMaREF (2013-6978) funded by the Swedish  
415 Research Council. This study was also supported by the Swedish Energy Agency (grant number 36155-  
416 1) and the Swedish Research Council (Grants 2011-7192 and 2012-3892) and Generalitat de Catalunya  
417 (Beatriu de Pinos BP-00385-2016). Sequencing was carried out at the SciLifeLab SNP/SEQ facility  
418 hosted by Uppsala University and we also acknowledge the Uppsala Multidisciplinary Centre for  
419 Advanced Computational Science (UPPMAX) for access to storage and computational resources.

### 420 **References**

- 421 1. UNEP. 2013. Global Mercury Assessment 2013: Sources, Emissions, Releases, and  
422 Environmental Transport. UNEP 42.
- 423 2. Amos HM, Jacob DJ, Streets DG, Sunderland EM. 2013. Legacy impacts of all-time  
424 anthropogenic emissions on the global mercury cycle. *Global Biogeochem Cycles* 27:410-421.
- 425 3. Lamborg C, Bowman K, Hammerschmidt C, Gilmour C, Munson K, Selin N, Tseng C-M. 2014.  
426 Mercury in the Anthropocene Ocean. *Oceanography* 27:76-87.
- 427 4. Gu B, Bian Y, Miller CL, Dong W, Jiang X, Liang L. 2011. Mercury reduction and complexation



- 428 by natural organic matter in anoxic environments. *Proc Natl Acad Sci* 108:1479–1483.
- 429 5. Drott A, Lambertsson L, Björn E, Skyllberg U. 2007. Importance of dissolved neutral mercury  
430 sulfides for methyl mercury production in contaminated sediments. *Environ Sci Technol*  
431 41:2270–2276.
- 432 6. Johansson K, Tyler G. 2001. Impact of atmospheric long range transport of lead, mercury and  
433 cadmium on the Swedish forest environment. *Water, Air Soil Pollut Focus* 1:279–297.
- 434 7. Xu J, Bravo AG, Lagerkvist A, Bertilsson S, Sjöblom R, Kumpiene J. 2014. Sources and  
435 remediation techniques for mercury contaminated soil. *Environ Int* 74:42–53.
- 436 8. Grigal DF. 2002. Inputs and outputs of mercury from terrestrial watersheds: a review. *Environ*  
437 *Rev* 10:1–39.
- 438 9. Bravo AG, Bouchet S, Tolu J, Björn E, Mateos-Rivera A, Bertilsson S. 2017. Molecular  
439 composition of organic matter controls methylmercury formation in boreal lakes. *Nat Commun*  
440 8:14255.
- 441 10. Isidorova A, Bravo AG, Riise G, Bouchet S, Björn E, Sobek S. 2016. The effect of lake browning  
442 and respiration mode on the burial and fate of carbon and mercury in the sediment of two boreal  
443 lakes. *J Geophys Res Biogeosciences* 121:233–245.
- 444 11. Hongve D, Haaland S, Riise G, Blakar I, Norton S. 2012. Decline of acid rain enhances mercury  
445 concentrations in fish. *Environ Sci Technol* 46:2490–1.
- 446 12. Åkerblom S, Nilsson M, Yu J, Ranney B, Johansson K. 2012. Temporal change estimation of  
447 mercury concentrations in northern pike (*Esox lucius* L.) in Swedish lakes. *Chemosphere* 86:439–  
448 445.
- 449 13. Gandhi N, Tang RWK, Bhavsar SP, Arhonditsis GB. 2014. Fish mercury levels appear to be  
450 increasing lately: A report from 40 years of monitoring in the province of Ontario, Canada.  
451 *Environ Sci Technol* 48:5404–5414.
- 452 14. Eklöf K, Bishop K, Bertilsson S, Björn E, Buck M, Skyllberg U, Osman OA, Kronberg RM,  
453 Bravo AG. 2018. Formation of mercury methylation hotspots as a consequence of forestry  
454 operations. *Sci Total Environ* 613–614:1069–1078.
- 455 15. Parks JM, Johs A, Podar M, Bridou R, Hurt RA, Smith SD, Tomanicek SJ, Qian Y, Brown SD,  
456 Brandt CC, Palumbo A V, Smith JC, Wall JD, Elias DA, Liang L. 2013. The genetic basis for  
457 bacterial mercury methylation. *Science* (80- ) 339:1332–1335.
- 458 16. Tjerngren, Karlsson T, Björn E, Skyllberg U. 2012. Potential Hg methylation and MeHg  
459 demethylation rates related to the nutrient status of different boreal wetlands. *Biogeochemistry*  
460 108:335–350.
- 461 17. Eckley CS, Hintelmann H. 2006. Determination of mercury methylation potentials in the water  
462 column of lakes across Canada. *Sci Total Environ* 368:111–125.
- 463 18. Monperrus M, Tessier E, Amouroux D, Leynaert A. 2007. Mercury methylation , demethylation  
464 and reduction rates in coastal and marine surface waters of the Mediterranean Sea. *Mar Chem*  
465 107:49–63.
- 466 19. Gascón Díez E, Loizeau J-L, Cosio C, Bouchet S, Adatte T, Amouroux D, Bravo AG. 2016. Role  
467 of Settling Particles on Mercury Methylation in the Oxic Water Column of Freshwater Systems.  
468 *Environ Sci Technol* 50:11672–11679.
- 469 20. Compeau GC, Bartha R. 1985. Sulfate-reducing Bacteria: principal methylators of mercury in  
470 anoxic estuarine sediment. *Appl Environ Microbiol* 50:498–502.
- 471 21. King JK, Kostka JE, Frischer ME, Saunders FM, Jahnke RA. 2001. A quantitative relationship  
472 that demonstrates mercury methylation rates in marine sediments are based on the community  
473 composition and activity of sulfate-reducing bacteria. *Environ Sci Technol* 35:2491–2496.

- 474 22. Fleming EJ, Mack EE, Green PG, Nelson DC. 2006. Mercury methylation from unexpected  
475 sources: molybdate-inhibited freshwater sediments and an iron-reducing bacterium. *Appl Environ*  
476 *Microbiol* 72:457–464.
- 477 23. Kerin EJ, Gilmour CC, Roden E, Suzuki MT, Coates JD, Mason RP. 2006. Mercury methylation  
478 by dissimilatory iron-reducing bacteria. *Appl Environ Microbiol* 72:7919–7921.
- 479 24. Hamelin S, Amyot M, Barkay T, Wang Y, Planas D. 2011. Methanogens: principal methylators  
480 of mercury in lake periphyton. *Environ Sci Technol* 45:7693–7700.
- 481 25. Gilmour CC, Podar M, Bullock AL, Graham AM, Brown SD, Somenahally AC, Johns A, Hurt  
482 RA, Bailey KL, Elias DA. 2013. Mercury methylation by novel microorganisms from new  
483 environments. *Environ Sci Technol* 47:11810–11820.
- 484 26. Jonsson S, Skjellberg U, Nilsson MB, Lundberg E, Andersson A, Björn E. 2014. Differentiated  
485 availability of geochemical mercury pools controls methylmercury levels in estuarine sediment  
486 and biota. *Nat Commun* 5:4624.
- 487 27. Ullrich SM, Tanton TW, Abdrashitova SA, Svetlana A. 2001. Mercury in the aquatic  
488 environment : a review of factors affecting methylation. *Crit Rev Environ Sci Technol* 31:241–  
489 293.
- 490 28. Bigham GN, Murray KJ, Masue-Slowey Y, Henry EA. 2017. Biogeochemical controls on  
491 methylmercury in soils and sediments: Implications for site management. *Integr Environ Assess*  
492 *Manag* 13:249–263.
- 493 29. Liem-Nguyen V, Skjellberg U, Björn E. 2017. Thermodynamic Modeling of the Solubility and  
494 Chemical Speciation of Mercury and Methylmercury Driven by Organic Thiols and Micromolar  
495 Sulfide Concentrations in Boreal Wetland Soils. *Environ Sci Technol* 51:3678–3686.
- 496 30. Chiasson-Gould SA, Blais JM, Poulain AJ. 2014. Dissolved organic matter kinetically controls  
497 mercury bioavailability to bacteria. *Environ Sci Technol* 48:3153–3161.
- 498 31. Schaefer JK, Morel FMM. 2009. High methylation rates of mercury bound to cysteine by  
499 *Geobacter sulfurreducens*. *Nat Geosci* 2:123–126.
- 500 32. Graham AM, Aiken GR, Gilmour CC. 2013. Effect of dissolved organic matter source and  
501 character on microbial Hg methylation in Hg-S-DOM solutions. *Environ Sci Technol* 47:5746–  
502 5754.
- 503 33. Gilmour CC, Ghosh U, Santillan EFU, Soren A, Bell JT, Butera D, McBurney AW, Brown S,  
504 Henry E, and Vlassopoulos D. 2015. Impacts of Activated Carbon Amendment on Hg  
505 Methylation, Demethylation and Microbial Activity in Marsh Soils AGU Fall Meeting.
- 506 34. Schaefer JK, Kronberg R-M, Morel FMM, Skjellberg U. 2014. Detection of a key Hg methylation  
507 gene, *hgcA*, in wetland soils. *Environ Microbiol Rep* n/a-n/a.
- 508 35. Bravo AG, Loizeau JL, Dranguet P, Makri S, Björn E, Ungureanu VG, Slaveykova VI, Cosio C.  
509 2016. Persistent Hg contamination and occurrence of Hg-methylating transcript (*hgcA*)  
510 downstream of a chlor-alkali plant in the Olt River (Romania). *Environ Sci Pollut Res* 1–13.
- 511 36. Bravo AG, Zopfi J, Buck M, Xu J, Bertilsson S, Schaefer JK, Poté J, and Cosio C. 2018.  
512 *Geobacteraceae* are important members of mercury-methylating microbial communities of  
513 sediments impacted by wastewater releases. *ISME J*.
- 514 37. Liu Y-R, Yu R-Q, Zheng Y-M, He J-Z. 2014. Analysis of the microbial community structure by  
515 monitoring an Hg methylation gene (*hgcA*) in paddy soils along an Hg gradient. *Appl Environ*  
516 *Microbiol* 80:2874–9.
- 517 38. Bae HS, Dierberg FE, Ogram A. 2014. Syntrophs dominate sequences associated with the  
518 mercury methylation-related gene *hgcA* in the water conservation areas of the Florida Everglades.  
519 *Appl Environ Microbiol* 80:6517–6526.
- 520 39. Podar M, Gilmour CC, Brandt CC, Soren A, Brown SD, Crable BR, Palumbo A V., Somenahally

- 521 AC, Elias DA. 2015. Global prevalence and distribution of genes and microorganisms involved in  
522 mercury methylation. *Sci Adv* 1:e1500675–e1500675.
- 523 40. Skjellberg ULF, Qian JIN, Frech W, Xia K. 2002. Distribution of mercury, methyl mercury and  
524 organic sulphur species in soil, soil solution and stream of a boreal forest catchment 1:53–76.
- 525 41. Kronberg RM, Jiskra M, Wiederhold JG, Björn E, Skjellberg U. 2016. Methyl mercury formation  
526 in hillslope soils of boreal forests: The role of forest harvest and anaerobic microbes. *Environ Sci  
527 Technol* 50:9177–9186.
- 528 42. Tjerngren I, Meili M, Björn E, Skjellberg U. 2012. Eight boreal wetlands as sources and sinks for  
529 methyl mercury in relation to soil acidity, C/N ratio, and small-scale flooding. *Environ Sci  
530 Technol* 46:8052–8060.
- 531 43. Yu RQ, Flanders JR, MacK EE, Turner R, Mirza MB, Barkay T. 2012. Contribution of coexisting  
532 sulfate and iron reducing bacteria to methylmercury production in freshwater river sediments.  
533 *Environ Sci Technol* 46:2684–2691.
- 534 44. Ranchou-Peyruse M, Monperrus M, Bridou R, Duran R, Amouroux D, Salvado JC, Guyoneaud  
535 R. 2009. Overview of mercury methylation capacities among anaerobic bacteria including  
536 representatives of the sulphate-reducers: implications for environmental studies. *Geomicrobiol J*  
537 26:1–8.
- 538 45. Achá D, Hintelmann H, Pabón CA. 2012. Sulfate-reducing bacteria and mercury methylation in  
539 the water column of the Lake 658 of the Experimental Lake Area. *Geomicrobiol J* 29:667–674.
- 540 46. King JK, Kostka JE, Frischer ME, Saunders FM. 2000. Sulfate-reducing bacteria methylate  
541 mercury at variable rates in pure culture and in marine sediments. *Appl Environ Microbiol*  
542 66:2430–2437.
- 543 47. Yu RQ, Adatto I, Montesdeoca MR, Driscoll CT, Hines ME, Barkay T. 2010. Mercury  
544 methylation in Sphagnum moss mats and its association with sulfate-reducing bacteria in an  
545 acidic Adirondack forest lake wetland. *FEMS Microbiol Ecol* 74:655–668.
- 546 48. Gilmour CC, Henry EA, Mitchell R. 1992. Sulfate stimulation of mercury methylation in  
547 freshwater sediments. *Environ Sci Technol* 26:2281–2287.
- 548 49. Plugge CM, Zhang W, Scholten JCM, Stams AJM. 2011. Metabolic flexibility of sulfate-  
549 reducing bacteria. *Front Microbiol* 2.
- 550 50. McInerney MJ, Struchtemeyer CG, Sieber J, Mouttaki H, Stams AJM, Schink B, Rohlin L,  
551 Gunsalus RP. 2008. Physiology, ecology, phylogeny, and genomics of microorganisms capable  
552 of syntrophic metabolism. *Ann N Y Acad Sci* 1125:58–72.
- 553 51. Pester M, Bittner N, Deevong P, Wagner M, Loy A. 2010. A “rare biosphere” microorganism  
554 contributes to sulfate reduction in a peatland. *ISME J* 4:1–12.
- 555 52. Wood JM. 1975. Biological cycles for elements in the environment. *Naturwissenschaften*  
556 62:357–364.
- 557 53. Liu YR, Wang JJ, Zheng YM, Zhang LM, He JZ. 2014. Patterns of Bacterial Diversity Along a  
558 Long-Term Mercury-Contaminated Gradient in the Paddy Soils. *Microb Ecol* 68:575–583.
- 559 54. Christensen GA, Wymore AM, King AJ, Podar M, Hurt RA, Santillan EU, Soren A, Brandt CC,  
560 Brown SD, Palumbo A V., Wall JD, Gilmour CC, Elias DA. 2016. Development and validation  
561 of broad-range qualitative and clade-specific quantitative molecular probes for assessing mercury  
562 methylation in the environment. *Appl Environ Microbiol* 82:6068–6078.
- 563 55. Skjellberg U, Drott A, Lambertsson L, Björn E, Karlsson T, Johnson T, Heinemo SA, Holmström  
564 H. 2007. Net methylmercury production as a basis for improved risk assessment of mercury-  
565 contaminated sediments. *Ambio* 36:437–442.
- 566 56. Drott A, Lambertsson L, Björn E, Skjellberg U. 2008. Do potential methylation rates reflect  
567 accumulated methyl mercury in contaminated sediments? *Environ Sci Technol* 42:153–158.

- 568 57. Remy S, Prudent P, Probst JL. 2006. Mercury speciation in soils of the industrialised Thur River  
569 catchment (Alsace, France). *Appl Geochemistry* 21:1855–1867.
- 570 58. Hunger S, Gößner AS, Drake HL. 2015. Anaerobic trophic interactions of contrasting methane-  
571 emitting mire soils: Processes versus taxa. *FEMS Microbiol Ecol* 91:1–14.
- 572 59. Ransom-Jones E, Jones DL, McCarthy AJ, McDonald JE. 2012. The Fibrobacteres: An Important  
573 Phylum of Cellulose-Degrading Bacteria. *Microb Ecol* 63:267–281.
- 574 60. Podosokorskaya OA, Kadnikov V V., Gavrillov SN, Mardanov A V., Merkel AY, Karnachuk O  
575 V., Ravin N V., Bonch-Osmolovskaya EA, Kublanov I V. 2013. Characterization of  
576 *Melioribacter roseus* gen. nov., sp. nov., a novel facultatively anaerobic thermophilic cellulolytic  
577 bacterium from the class Ignavibacteria, and a proposal of a novel bacterial phylum  
578 Ignavibacteriae. *Environ Microbiol* 15:1759–1771.
- 579 61. Liang B, Wang LY, Mbadinga SM, Liu JF, Yang SZ, Gu JD, Mu BZ. 2015. Anaerolineaceae and  
580 Methanosaeta turned to be the dominant microorganisms in alkanes-dependent methanogenic  
581 culture after long-term of incubation. *AMB Express* 5.
- 582 62. Juottonen H, Eiler A, Biasi C, Tuittila E-S, Yrjälä K, Fritze H. 2017. Distinct Anaerobic Bacterial  
583 Consumers of Cellobiose-Derived Carbon in Boreal Fens with Different CO<sub>2</sub> /CH<sub>4</sub> Production  
584 Ratios. *Appl Environ Microbiol* 83:e02533-16.
- 585 63. Kuever J. 2014. The family desulfobulbaceae, p. 75–86. *In* The Prokaryotes: Deltaproteobacteria  
586 and Epsilonproteobacteria.
- 587 64. Holmes DE, Shrestha PM, Walker DJF, Dang Y, Nevin KP, Woodard TL, Lovley DR. 2017.  
588 Metatranscriptomic evidence for direct interspecies electron transfer between *Geobacter* and  
589 *Methanotherix* species in methanogenic rice paddy soils. *Appl Environ Microbiol* 2.
- 590 65. WRB. 2014. World Reference Base for Soil Resources 2014, update 2015. International soil  
591 classification system for naming soils and creating legends for soil maps. World Soil Resources  
592 Reports No. 106World Soil Resources Reports No. 106.
- 593 66. Eklöf K, Meili M, Åkerblom S, von Brömssen C, Bishop K. 2013. Impact of stump harvest on  
594 run-off concentrations of total mercury and methylmercury. *For Ecol Manage* 290:83–94.
- 595 67. Löfgren S, Ring E, von Brömssen C, Sørensen R, Högbom L. 2009. Short-term effects of clear-  
596 cutting on the water chemistry of two boreal streams in northern Sweden: a paired catchment  
597 study. *Ambio* 38:347–356.
- 598 68. Lambertsson L, Lundberg E, Nilsson M, Frech W. 2001. Applications of enriched stable isotope  
599 tracers in combination with isotope dilution GC-ICP-MS to study mercury species transformation  
600 in sea sediments during in situ. *J Anal At Spectrom* 16:1296–1301.
- 601 69. Sinclair L, Osman OA, Bertilsson S, Eiler A. 2015. Microbial community composition and  
602 diversity via 16S rRNA gene amplicons: Evaluating the Illumina platform. *PLoS One*  
603 10:e0116955.
- 604 70. Edgar RC. 2013. UPARSE: highly accurate OTU sequences from microbial amplicon reads. *Nat*  
605 *Methods* 10:996–8.
- 606 71. Edgar RC, Flyvbjerg H. 2015. Error filtering, pair assembly and error correction for next-  
607 generation sequencing reads. *Bioinformatics* 31:3476–3482.
- 608 72. Edgar R. 2016. SINTAX: a simple non-Bayesian taxonomy classifier for 16S and ITS sequences.  
609 bioRxiv 74161.
- 610 73. Joshi NA, Fass JN. 2011. Sickle: A sliding-window, adaptive, quality-based trimming tool for  
611 FastQ files.
- 612 74. Martin M. 2011. Cutadapt removes adapter sequences from high-throughput sequencing reads.  
613 *EMBnetjournal* 17:10–12.

- 614 75. Fu L, Niu B, Zhu Z, Wu S, Li W. 2012. CD-HIT: Accelerated for clustering the next-generation  
615 sequencing data. *Bioinformatics* 28:3150–3152.
- 616 76. Eddy SR. 2011. Accelerated profile HMM searches. *PLoS Comput Biol* 7:e1002195.
- 617 77. Chamberlain SA, Szöcs E. 2013. taxize: taxonomic search and retrieval in R. *F1000Research*  
618 2:191.
- 619 78. Edgar RC. 2004. MUSCLE: Multiple sequence alignment with high accuracy and high  
620 throughput. *Nucleic Acids Res* 32:1792–1797.
- 621 79. Stamatakis A. 2014. RAxML version 8: A tool for phylogenetic analysis and post-analysis of  
622 large phylogenies. *Bioinformatics* 30:1312–1313.
- 623 80. Matsen FA, Kodner RB, Armbrust EV. 2010. pplacer: Linear time maximum-likelihood and  
624 Bayesian phylogenetic placement of sequences onto a fixed reference tree. *BMC Bioinformatics*.
- 625 81. Clarke KR, Gorley RN. 2015. PRIMER v7: User Manual/Tutorial. Prim Plymouth UK 192 p.  
626

627 **Table 1.** Comparison of the relative abundances (%) of the most abundant taxa (phylum level) in all the samples  
 628 (n=200) with the 34 MeHg hotspots based on 16S rRNA sequences. Relative abundances of classes under phylum  
 629 *Proteobacteria* are listed with indent (SD: Standard deviation)

| Most abundant taxa           | Mean ± SD    |             | Maximum     |          | Minimum     |          |
|------------------------------|--------------|-------------|-------------|----------|-------------|----------|
|                              | All samples  | Hotspots    | All samples | Hotspots | All samples | Hotspots |
| <i>Acidobacteria</i>         | 36.11 ±10.53 | 25.57 ±8.77 | 73.64       | 49.29    | 8.10        | 9.40     |
| <i>Proteobacteria</i>        | 13.99 ±4.03  | 16.56 ±2.96 | 28.13       | 27.60    | 2.90        | 8.87     |
| <i>Alphaproteobacteria</i>   | 6.83 ±3.01   | 7.13 ±2.81  | 16.43       | 13.95    | 1.77        | 2.66     |
| <i>Deltaproteobacteria</i>   | 3.31 ±1.69   | 3.56 ±1.38  | 13.36       | 7.15     | 0.71        | 1.30     |
| <i>Gammaproteobacteria</i>   | 2.06 ±1.33   | 1.48 ±0.76  | 7.15        | 3.66     | 0.24        | 0.35     |
| <i>Betaproteobacteria</i>    | 1.78 ±2.13   | 4.14 ±2.47  | 11.11       | 10.46    | 0.00        | 0.65     |
| <i>Epsilonproteobacteria</i> | 0.01 ±0.03   | 0.03 ±0.06  | 0.30        | 0.24     | 0.00        | 0.00     |
| <i>Planctomycetes</i>        | 8.18 ±4.21   | 5.82 ±2.77  | 24.82       | 11.64    | 1.36        | 1.95     |
| <i>Bacteroidetes</i>         | 6.61 ±5.24   | 11.38 ±7.92 | 51.60       | 51.60    | 0.41        | 1.60     |
| <i>Parcubacteria</i>         | 6.35 ±4.19   | 9.01 ±5.14  | 26.36       | 24.47    | 0.06        | 2.13     |
| <i>Verrucomicrobia</i>       | 6.28 ±2.78   | 5.30 ±2.31  | 14.89       | 10.64    | 0.65        | 0.65     |
| <i>Thaumarchaeota</i>        | 3.96 ±2.77   | 2.53 ±2.44  | 18.44       | 14.83    | 0.00        | 0.00     |
| <i>Actinobacteria</i>        | 3.11 ±2.38   | 2.94 ±1.62  | 19.86       | 6.03     | 0.47        | 0.89     |
| <i>Chlamydiae</i>            | 2.83 ±2.56   | 1.31 ±1.08  | 22.87       | 3.71     | 0.24        | 0.30     |
| <i>Chloroflexi</i>           | 2.60 ±3.18   | 7.16 ±5.18  | 17.79       | 15.19    | 0.00        | 0.12     |
| <i>Others</i>                | 9.97 ±0.89   | 12.41 ±1.66 | 17.14       | 8.98     | 0.00        | 0.00     |

630

631

632

633 **Table 2.** Moderate ( $0.5 \leq R < 0.7$ ) to weak ( $0.3 \leq R < 0.5$ ) Pearson correlations between families and %MeHg in all  
 634 samples based on 16S rRNA. Families potentially involved in Hg methylation were marked in bold.

| Families                              | Correlations with %MeHg |
|---------------------------------------|-------------------------|
| <i>Unclassified Fibrobacterales</i>   | 0.56                    |
| <b><i>Methanotherix</i></b>           | 0.54                    |
| <i>Unclassified Ignavibacteriales</i> | 0.52                    |
| <i>Spirochaetaceae</i>                | 0.52                    |
| <i>Holophagaceae</i>                  | 0.50                    |
| <i>Anaerolineaceae</i>                | 0.41                    |
| <i>Lentimicrobiaceae</i>              | 0.40                    |
| <b><i>Syntrophobacteraceae</i></b>    | 0.39                    |
| <i>Unclassified Phycisphaerales</i>   | 0.37                    |
| <b><i>Methanosarcinaceae</i></b>      | 0.37                    |
| <b><i>Methanoregulaceae</i></b>       | 0.35                    |
| <b><i>Desulfobulbaceae</i></b>        | 0.35                    |
| <i>Porphyromonadaceae</i>             | 0.35                    |
| <i>Rhodobiaceae</i>                   | 0.33                    |
| <i>Unclassified Clostridiales</i>     | 0.32                    |
| <i>Gemmatimonadaceae</i>              | 0.30                    |
| <b><i>Syntrophaceae</i></b>           | 0.30                    |
| <i>Unclassified Omnitrophica</i>      | 0.30                    |
| <i>Nitrosomonadaceae</i>              | 0.30                    |
| <b><i>Desulfobacteraceae</i></b>      | 0.30                    |
| <b><i>Dehalococcoidaceae</i></b>      | 0.30                    |
| <i>Unclassified Obscuribacterales</i> | -0.30                   |
| <i>Unclassified Solibacterales</i>    | -0.33                   |
| <i>Tepidisphaeraceae</i>              | -0.38                   |

635

636 **Table 3.** Relative abundance of families involved in Hg<sup>(II)</sup> methylation based on *hgcA* sequences in 34 hotspots.

| Families                                | Örebro                 | Balsjö                 | Strömsjöleden          |
|-----------------------------------------|------------------------|------------------------|------------------------|
|                                         | % of <i>hgcA</i> reads | % of <i>hgcA</i> reads | % of <i>hgcA</i> reads |
| <i>Unclassified Deltaproteobacteria</i> | 43.24±37.11            | 44.85±30.09            | 55.69±18.23            |
| <i>Geobacteraceae</i>                   | 26.79±31.09            | 24.62±22.22            | 39.40±18.96            |
| <i>Unclassified Bacteria</i>            | 10.72±17.45            | 25.58±33.67            | 1.43±1.02              |
| <i>Ruminococcaceae</i>                  | 9.12±18.23             | 1.52±2.30              | 0.15±0.04              |
| <i>Unclassified</i>                     | 6.62±8.65              | 2.37±3.86              | 1.27±2.98              |
| <i>Unclassified Euryarchaeota</i>       | 0.84±2.22              | 0.02±0.02              | 0.01±0.02              |
| <i>Desulfovibrionaceae</i>              | 0.83±1.28              | 0.16±0.03              | 0.02±0.04              |
| <i>Unclassified Methanomicrobiales</i>  | 0.49±1.21              | 0.06±0.09              | 0.03±0.12              |
| <i>Syntrophaceae</i>                    | 0.35±0.45              | 0.05±0.00              | 0.00±0.00              |
| <i>Methanomassiliicoccaceae</i>         | 0.31±0.53              | 0.02±0.00              | 0.13±0.05              |
| <i>Methanoregulaceae</i>                | 0.20±0.03              | 0.06±0.03              | 0.00±0.01              |
| <i>Syntrophomonadaceae</i>              | 0.17±0.13              | 0.02±0.03              | 0.13±0.04              |
| <i>Unclassified Desulfovibrionales</i>  | 0.14±0.15              | 0.02±0.05              | 0.03±0.04              |
| <i>Unclassified Clostridiales</i>       | 0.06±0.22              | 0.51±0.19              | 0.08±0.07              |
| <i>Unclassified Firmicutes</i>          | 0.06±0.02              | 0.00±0.00              | 0.00±0.00              |
| <i>Unclassified Desulfuromonadales</i>  | 0.03±0.00              | 0.10±0.03              | 0.39±0.32              |
| <i>Desulfobulbaceae</i>                 | 0.02±0.02              | 0.01±0.00              | 0.00±0.01              |
| <i>Desulfuromonadaceae</i>              | 0.01±0.01              | 0.00±0.04              | 0.00±0.04              |
| <i>Syntrophorhabdaceae</i>              | 0.01±0.00              | 0.00±0.02              | 0.00±0.06              |
| <i>Unclassified Deferrisoma</i>         | 0.01±0.00              | 0.00±0.00              | 1.18±0.98              |
| <i>Desulfarculaceae</i>                 | 0.00±0.02              | 0.00±0.00              | 0.00±0.02              |
| <i>Pelobacteraceae</i>                  | 0.00±0.01              | 0.01±0.01              | 0.07±0.03              |

637



638

639

640 **Figure 1.** Non-metric multidimensional scaling (nMDS) of microbial community composition of all samples  
641 (family level based on 16S rRNA) overlaid with families (black lint) and geochemical factors (dotted brown line)  
642 moderately correlated with biotic ordination (correlation coefficients > 0.5) (%MeHg: MeHg/THg). Relative  
643 dissimilarities (or distances) among the samples were computed according to the resemblance matrix  
644 calculated on fourth rooted family reads.

645

646 **Figure 2.** Non-metric multidimensional scaling (nMDS) of potential Hg methylators (family level based on *hgcA*)  
647 in 34 hotspots overlaid with geochemical factors that were moderately correlated with the biotic ordination  
648 positions (correlation coefficients > 0.5)

649

650 **Figure 3.** Phylogenetic relationships of *Deltaproteobacterial hgcA* sequences in the studied forest soils. The 20  
651 most abundant *Deltaproteobacteria* are in blue. The OTUs taxonomically assigned as *Geobacter* are indicated in  
652 the plot “*Geobacter sp.*”. OTUs non-taxonomically assigned are presented as “OTU”. Reference genomes are  
653 marked in brown. The tree was generated using RAxML (version 8.2.4) with the PROTGAMMLG model and the  
654 autoMR to choose the number of necessary bootstraps (750). Please see details of the collapsed tree in the Fig.  
655 S2.

656

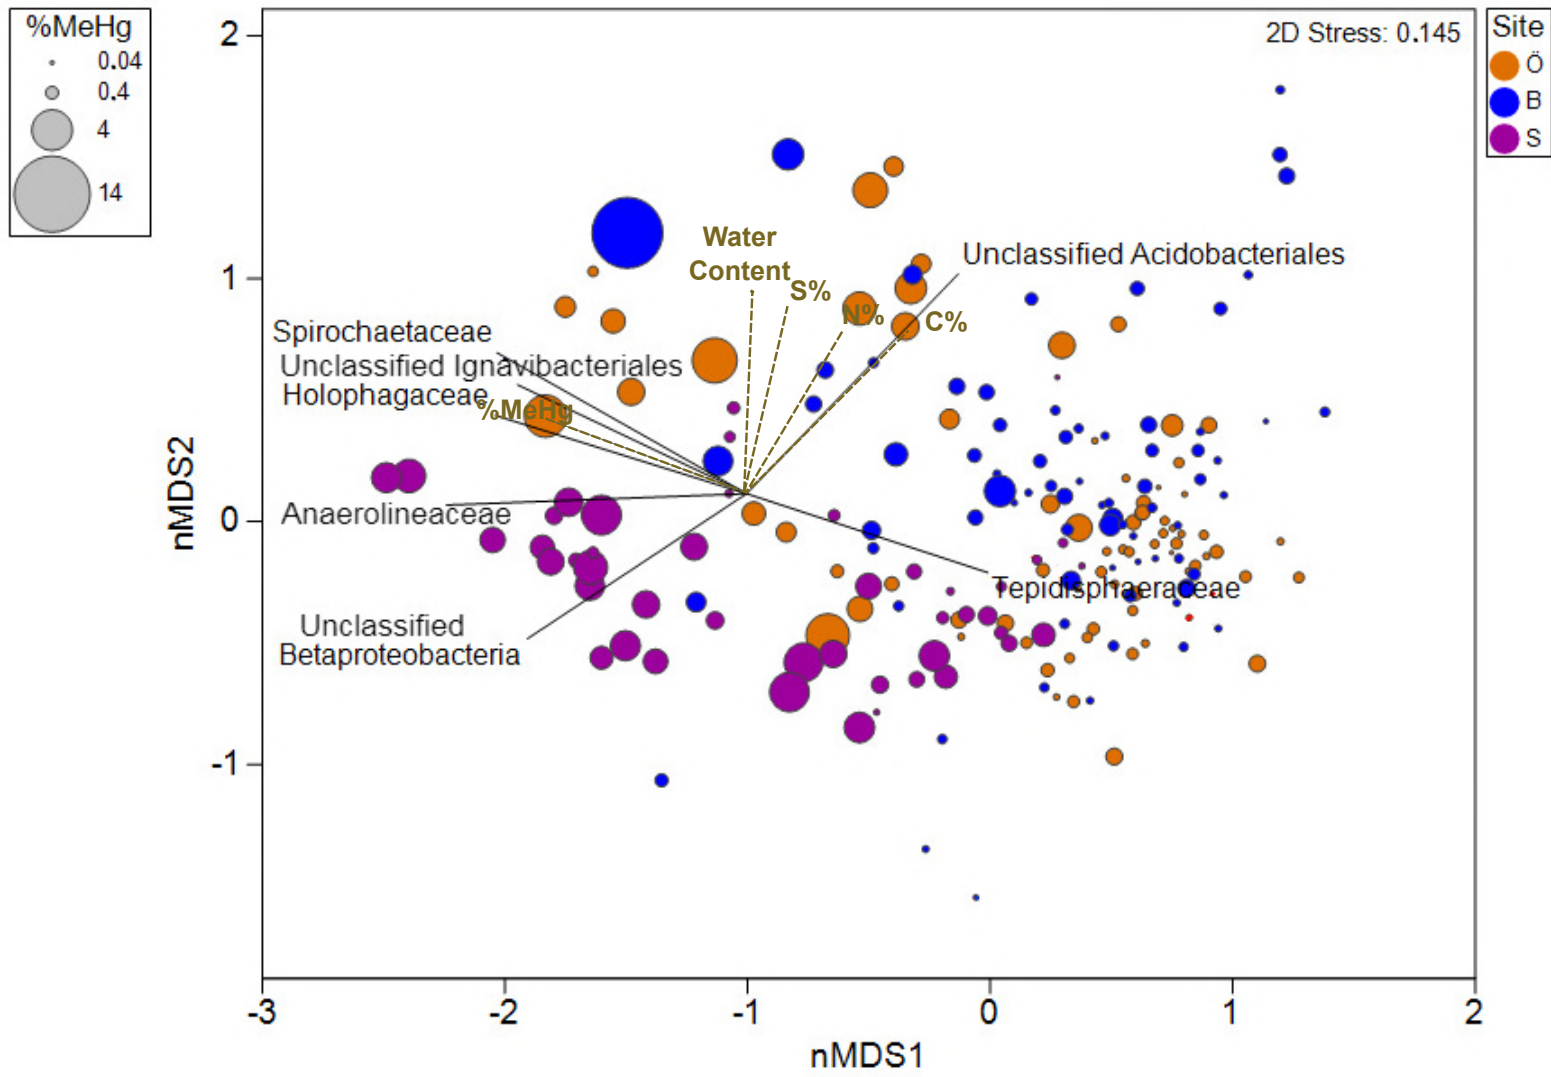

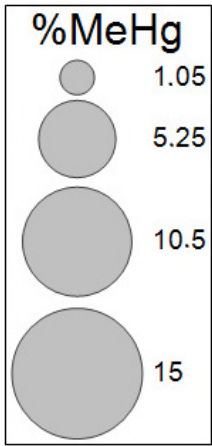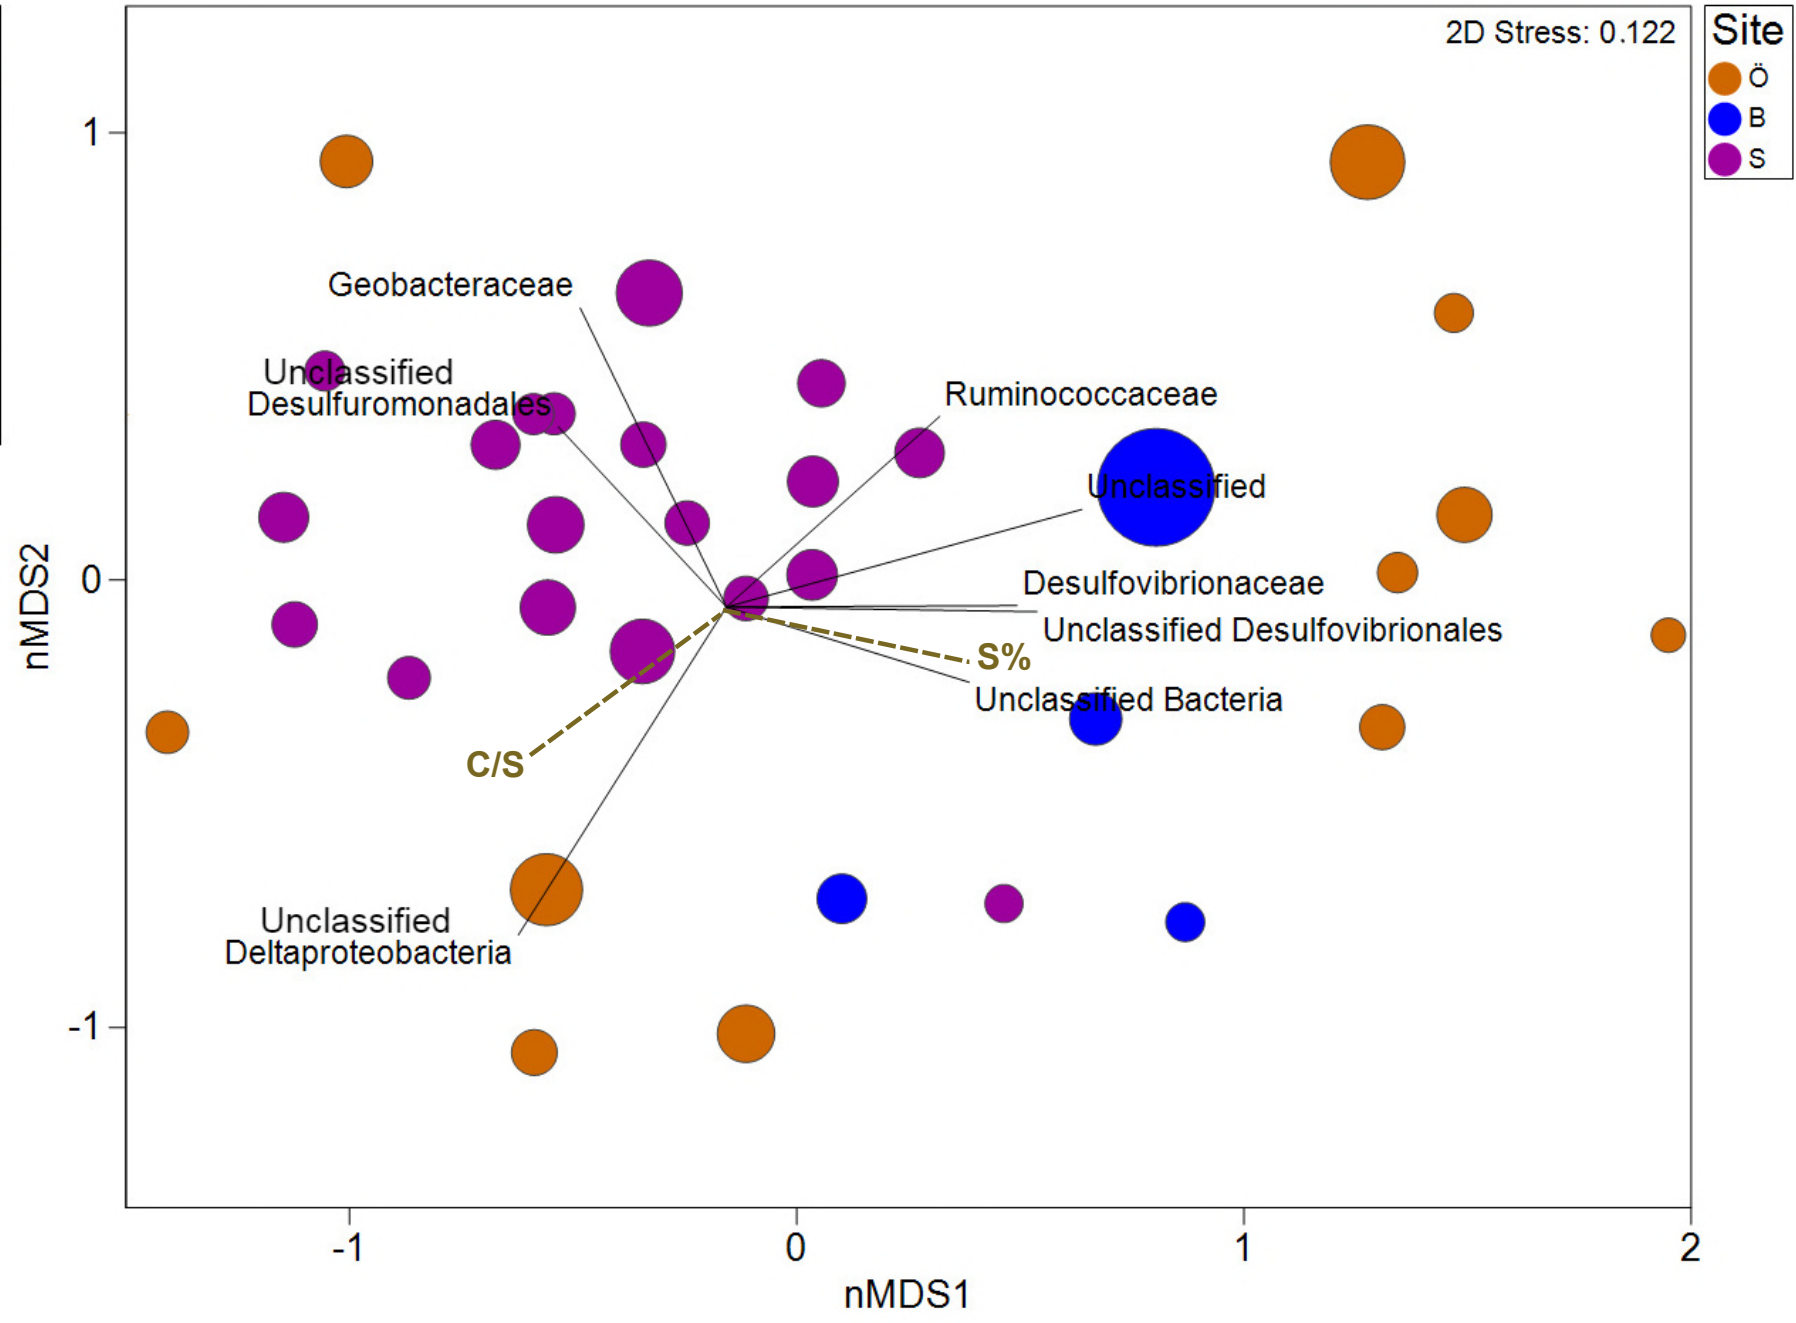

Source: http://biorxiv.org/content/10.1101/299248v1.full.pdf
